# Supplementary material
Source: PubMed Central journal article supplement (PMC4457472)
Supplement: NIHMS230573-supplement-02.pdf [file NIHMS230573-supplement-02.pdf]

## Inventory of Supplemental Information

**Supplemental Data** include six Supplemental Figures, five supplemental Tables, Supplemental Experimental Procedures, and Supplemental References.

**Fig. S1** supplements Fig. 1, describing cerebellar histopathology, motor ability and *Nnal* mutation in conventional *pcd*<sup>2J-4J</sup> mutants.

**Fig. S2** supplements Fig. 2, verifying establishment of a cutting-edge technique of laser capture microdissection plus global gene profiling, and providing data on spatial and temporal expression of lysyl oxidase in developing mouse central nervous system.

**Fig. S3** supplements Fig. 3, showing time course of cell treatment, lentiviral vector-mediated transduction in cerebellar cell cultures and 293Ta cell cultures.

**Fig. S4** supplements Fig. 4, showing time course of slice treatment, lentiviral vector-mediated transduction and Purkinje cell viability in cerebellar slice cultures.

**Fig. S5** supplements Fig. 5, showing time course of neonatal injection and lentiviral vector-mediated transduction in the cerebellar cortex in vivo.

**Fig. S6** supplements Fig. 8, showing quantification of microtubules and related regulators in vivo and in vitro.

**Table S1** supplements Fig. 1, showing five pairs of primers for mouse *Nna1* cDNA and the length of each fragment.

**Table S2** supplements Fig. 2, comparing top 10 gene signals between wild-type Purkinje cells, granule cells and entire cerebellum.

**Table S3** supplements Figs. 3 and 7, presenting qPCR primers for changed genes checked by microarray, and for the NF- $\kappa$ B family.

**Table S4** supplements Figs. 3, 4, 7 and 8, showing shRNA sequences of *Nna1*, *Lox*, *RelA* and *MAPs*.

**Table S5** supplements Figs. 3-8, providing schematic structures of lentiviral vectors of shRNAs and cDNAs.

**Supplemental Experimental Procedures** provide complete protocols including detailed methods, instruments, chemicals, antibodies and other reagents used in the present study.

**Supplemental References** include 4 cited references in Supplemental Experimental Procedures.
